# Supplementary material
Source: PubMed Central journal article supplement (PMC8215841)
Supplement: NIHMS1705760-supplement-1.pdf [file NIHMS1705760-supplement-1.pdf]

Supplemental Material

Supplemental Table 1: Comparison of participants who did or did not return for visit 2

| Variable                                        | Returned for Visit 2 |            |                  |              |              |        | p-value <sup>§</sup> | p-value <sup>¥</sup> |
|-------------------------------------------------|----------------------|------------|------------------|--------------|--------------|--------|----------------------|----------------------|
|                                                 | Yes (n=989)          | No (n=301) |                  |              |              |        |                      |                      |
|                                                 |                      | Total      | Hispanic (n=175) | Black (n=61) | White (n=57) |        |                      |                      |
| Global cognitive domain Z-score at visit 1 (SD) | 0.1 (0.7)            | -0.3 (0.8) | -0.39(0.72)      | -0.35(0.87)  | 0.07(0.67)   | <.0001 | <.0001               |                      |
| Age, visit 1                                    | 69 (9)               | 75 (9)     | 73 (9)           | 76 (10)      | 78 (9)       | 0.0003 | <.0001               |                      |
| Education, years                                | 10 (5)               | 10 (5)     | 8 (5)            | 12 (4)       | 13 (4)       | <.0001 | 0.905                |                      |
| Race/ethnicity*                                 |                      |            |                  |              |              | N/A    |                      |                      |
| White                                           | 134 (14)             | 57 (19)    | N/A              | N/A          | N/A          |        | 0.007                |                      |
| Black                                           | 162 (16)             | 61 (20)    | N/A              | N/A          | N/A          |        |                      |                      |
| Hispanic                                        | 672 (68)             | 175 (58)   | N/A              | N/A          | N/A          |        |                      |                      |
| Women                                           | 610 (62)             | 170 (57)   | 102 (58)         | 32 (53)      | 31(54)       | 0.53   | 0.106                |                      |
| Medical insurance status                        |                      |            |                  |              |              |        |                      |                      |
| Medicare or private insurance                   | 505 (51)             | 172 (57)   | 66 (38)          | 46 (75)      | 54 (95)      | <.0001 | 0.064                |                      |
| Medicaid or no insurance                        | 484 (49)             | 129 (43)   | 109 (62)         | 15 (25)      | 3 (5)        |        |                      |                      |

|                                     |               |               |               |                |              |        |        |
|-------------------------------------|---------------|---------------|---------------|----------------|--------------|--------|--------|
| Literacy Z-scores                   |               |               |               |                |              |        |        |
| WRAT/WAT                            | 0.01 (0.9)    | -0.05 (1.04)  | -0.003(0.952) | -0.358(1.202)  | 0.268(0.830) | 0.003  | 0.387  |
| Peabody                             | 0.05 (1.0)    | -0.16 (1.0)   | -0.116(1.002) | -0.579 (1.150) | 0.179(0.723) | 0.0002 | 0.003  |
| Current smoker                      | 155 (16)      | 48 (16)       | 25 (14)       | 16 (26)        | 6 (11)       | 0.034  | 0.909  |
| Moderate or Heavy Physical Activity | 97 (10)       | 34 (11)       | 17 (9)        | 8 (13)         | 7 (12)       | 0.417  | 0.464  |
| Diabetes mellitus                   |               |               |               |                |              |        |        |
| Diabetes mellitus                   | 267 (27)      | 86 (29)       | 63 (36)       | 12 (20)        | 7 (12)       | 0.0008 | 0.592  |
| Anti-hypertensive use               |               |               |               |                |              |        |        |
| Anti-hypertensive use               | 590 (60)      | 193 (64)      | 114 (65)      | 38 (62)        | 36 (63)      | 0.667  | 0.165  |
| Systolic BP, mm Hg                  |               |               |               |                |              |        |        |
| Systolic BP, mm Hg                  | 136 (17)      | 139 (18)      | 139 (18)      | 141 (15)       | 134 (15)     | 0.057  | 0.004  |
| Diastolic BP, mm Hg                 |               |               |               |                |              |        |        |
| Diastolic BP, mm Hg                 | 79 (9)        | 76 (10)       | 77 (11)       | 78 (10)        | 72 (10)      | 0.015  | 0.0005 |
| HDL, mg/dL                          |               |               |               |                |              |        |        |
| HDL, mg/dL                          | 53 (17)       | 54.9 (17)     | 50 (14)       | 65 (21)        | 58 (17)      | <.0001 | 0.079  |
| LDL, mg/dL                          |               |               |               |                |              |        |        |
| LDL, mg/dL                          | 116 (36)      | 114.2 (34)    | 117 (34)      | 109 (33)       | 111 (34)     | 0.371  | 0.442  |
| Waist Hip Ratio                     |               |               |               |                |              |        |        |
| Waist Hip Ratio                     | 0.915 (0.084) | 0.924 (0.080) | 0.928(0.075)  | 0.921(0.073)   | 0.918(0.105) | 0.808  | 0.117  |
| Percent WMHV**                      |               |               |               |                |              |        |        |
| Percent WMHV**                      | 0.594 (0.737) | 0.955 (1.066) | 0.923(1.008)  | 1.320(1.373)   | 0.662(0.716) | 0.002  | <.0001 |
| Brain parenchymal fraction***       |               |               |               |                |              |        |        |
| Brain parenchymal fraction***       | 0.730 (0.040) | 0.706 (0.046) | 0.713(0.039)  | 0.702(0.056)   | 0.689(0.047) | 0.196  | <.0001 |

<sup>§</sup> p-value for age adjusted global comparison among three race/ethnic groups (2 degrees of freedom)

‡ p-value for comparison between those who returned for visit2 and those who did not

\* Column percentages sum to 98 because data for Other races are not included.

WAT = Word Accentuation Test; Peabody = Peabody Picture Vocabulary Test; BP = blood pressure; HDL = high density lipoprotein; LDL = low density lipoprotein; WRAT = Wide Range Achievement Test.

\*\* Percent Total Cranial Volume adjusted WMHV

\*\*\* Total Cranial Volume adjusted (proportion)

**Supplemental Table 2: Multivariable model of race/ethnicity and ordinal outcome of MCI/dementia among participants that were cognitively healthy at visit 1**

| Parameter          | OR  | 95% CI of OR | p-value* | p-value** |
|--------------------|-----|--------------|----------|-----------|
| <b>Model 1</b>     |     |              |          |           |
| Black vs. White    | 1.8 | 0.8 4        | 0.175    | <.0001    |
| Hispanic vs. White | 6   | 2.7 13.6     | <.0001   |           |
| Hispanic vs. Black | 3.4 | 1.7 7.1      | 0.0008   |           |
| <b>Model 2</b>     |     |              |          |           |
| Black vs. White    | 1.8 | 0.7 4.1      | 0.364    | <.0001    |
| Hispanic vs. White | 6.9 | 2.9 16.8     | 0.0001   |           |
| Hispanic vs. Black | 3.9 | 1.7 9.0      | 0.0011   |           |
| <b>Model 3</b>     |     |              |          |           |
| Black vs. White    | 1.7 | 0.7 3.8      | 0.215    | <.0001    |
| Hispanic vs. White | 5.9 | 2.6 13.4     | <.0001   |           |
| Hispanic vs. Black | 3.5 | 1.7 7.2      | 0.0009   |           |

Cognitively healthy defined as MMSE score of 27 or greater.

\* p-value for testing pairwise comparison based on ordinal regression

\*\* p-value for Likelihood Ratio Test with 2 degrees of freedom

Model 1 adjusted for age, education, medical insurance status, literacy.

Model 2 adjusted for variables in model 1 and smoking, leisure time physical activity, diabetes mellitus, systolic and diastolic blood pressure, antihypertensive use, low and high density lipoprotein levels, waist hip ratio, and reported ethanol use.

Model 3 adjusted for variables in model 1 and brain parenchymal fraction, subclinical infarct status, and log white matter hyperintensity volume.

**Supplemental Table 3: Sensitivity analysis examining race/ethnic associations with outcomes of MCI/dementia versus cognitively healthy, and dementia versus MCI/cognitively healthy**

|                    | MCI/Dementia combined vs. Healthy |              |          |           | Dementia vs. MCI/Healthy combined |              |          |           |
|--------------------|-----------------------------------|--------------|----------|-----------|-----------------------------------|--------------|----------|-----------|
|                    | OR                                | 95% CI of OR | p-value* | p-value** | OR                                | 95% CI of OR | p-value* | p-value** |
| Model 1            |                                   |              |          | <.0001    |                                   |              |          | 0.0208    |
| Black vs. White    | 2.0                               | 1.0 3.8      | 0.043    |           | 1.7                               | 0.3 9.4      | 0.516    |           |
| Hispanic vs. white | 4.4                               | 2.2 8.8      | <.0001   |           | 7.3                               | 1.3 40.7     | 0.022    |           |
| Hispanic vs. Black | 2.2                               | 1.3 3.9      | 0.004    |           | 4.2                               | 1.2 15.1     | 0.028    |           |
| Model 2            |                                   |              |          | <.0001    |                                   |              |          | 0.0624    |
| Black vs. White    | 1.8                               | 0.9 3.7      | 0.087    |           | 2.0                               | 0.3 11.3     | 0.456    |           |
| Hispanic vs. white | 4.5                               | 2.1 9.3      | <.0001   |           | 6.6                               | 1.1 39.8     | 0.039    |           |
| Hispanic vs. Black | 2.4                               | 1.3 4.4      | 0.003    |           | 3.4                               | 0.8 13.8     | 0.089    |           |
| Model 3            |                                   |              |          | <.0001    |                                   |              |          | 0.0304    |
| Black vs. White    | 1.8                               | 0.9 3.5      | 0.084    |           | 1.4                               | 0.2 7.7      | 0.718    |           |
| Hispanic vs. white | 4.3                               | 2.1 8.7      | <.0001   |           | 5.9                               | 1.1 32.8     | 0.041    |           |
| Hispanic vs. Black | 2.4                               | 1.4 4.2      | 0.003    |           | 4.3                               | 1.2 15.8     | 0.027    |           |

\* p-value for testing pairwise comparison based on logistic regression

\*\* p-value for Likelihood Ratio Test with 2 degrees of freedom

Model 1 adjusted for age, education, medical insurance status, literacy.

Model 2 adjusted for variables in model 1 and smoking, leisure time physical

activity, diabetes mellitus, systolic and diastolic blood pressure, antihypertensive

use, low and high density lipoprotein levels, waist hip ratio, and reported ethanol use.

Model 3 adjusted for variables in model 1 and brain parenchymal fraction, subclinical infarct status, and log white matter hyperintensity volume.
